# Supplementary material
Source: ML conference proceedings conference paper supplement (https://openreview.net/forum?id=a3cauWMXNV)
Supplement: supplementary_material [file S115_id.xls]

## Sheet: Vote Matrix
icpsr	id	name	state_abbrev	V1
40300	MS11540300	MURKOWSKI, Lisa	AK	6
41500	MS11541500	SULLIVAN, Daniel Scott	AK	6
49700	MS11549700	SESSIONS, Jefferson Beauregard III (Jeff)	AL	9
94659	MS11594659	SHELBY, Richard C.	AL	6
20101	MS11520101	BOOZMAN, John	AR	6
21301	MS11521301	COTTON, Tom	AR	6
15039	MS11515039	McCAIN, John Sidney, III	AZ	6
20100	MS11520100	FLAKE, Jeff	AZ	6
41701	MS11541701	HARRIS, Kamala Devi	CA	1
49300	MS11549300	FEINSTEIN, Dianne	CA	9
21112	MS11521112	GARDNER, Cory	CO	6
40910	MS11540910	BENNET, Michael F.	CO	1
20707	MS11520707	MURPHY, Christopher	CT	1
41101	MS11541101	BLUMENTHAL, Richard	CT	1
15015	MS11515015	CARPER, Thomas Richard	DE	1
40916	MS11540916	COONS, Christopher A.	DE	1
14651	MS11514651	NELSON, Clarence William (Bill)	FL	1
41102	MS11541102	RUBIO, Marco	FL	6
29909	MS11529909	ISAKSON, Johnny	GA	6
41501	MS11541501	PERDUE, David Alfred, Jr.	GA	6
20713	MS11520713	HIRONO, Mazie	HI	1
41112	MS11541112	SCHATZ, Brian Emanuel	HI	1
14226	MS11514226	GRASSLEY, Charles Ernest	IA	6
41502	MS11541502	ERNST, Joni	IA	6
29345	MS11529345	CRAPO, Michael Dean	ID	6
40902	MS11540902	RISCH, James	ID	6
15021	MS11515021	DURBIN, Richard Joseph	IL	1
21325	MS11521325	DUCKWORTH, Tammy	IL	1
20717	MS11520717	DONNELLY, Joe	IN	1
21133	MS11521133	YOUNG, Todd	IN	6
14852	MS11514852	ROBERTS, Charles Patrick (Pat)	KS	6
29722	MS11529722	MORAN, Jerry	KS	6
14921	MS11514921	McCONNELL, Addison Mitchell (Mitch)	KY	6
41104	MS11541104	PAUL, Rand	KY	6
20919	MS11520919	CASSIDY, Bill	LA	6
41703	MS11541703	KENNEDY, John Neely	LA	6
14435	MS11514435	MARKEY, Edward John	MA	1
41301	MS11541301	WARREN, Elizabeth	MA	1
15408	MS11515408	CARDIN, Benjamin Louis	MD	1
20330	MS11520330	VAN HOLLEN, Christopher	MD	1
41300	MS11541300	KING, Angus Stanley, Jr.	ME	1
49703	MS11549703	COLLINS, Susan Margaret	ME	1
20923	MS11520923	PETERS, Gary C.	MI	1
29732	MS11529732	STABENOW, Deborah Ann	MI	1
40700	MS11540700	KLOBUCHAR, Amy	MN	1
40904	MS11540904	FRANKEN, Al	MN	1
29735	MS11529735	BLUNT, Roy	MO	6
40701	MS11540701	McCASKILL, Claire	MO	1
14009	MS11514009	COCHRAN, William Thad	MS	6
29534	MS11529534	WICKER, Roger F.	MS	6
21338	MS11521338	DAINES, Steve	MT	6
40702	MS11540702	TESTER, Jon	MT	1
29548	MS11529548	BURR, Richard M.	NC	6
41504	MS11541504	TILLIS, Thomas Roland (Thom)	NC	6
41107	MS11541107	HOEVEN, John	ND	6
41303	MS11541303	HEITKAMP, Mary Kathryn (Heidi)	ND	1
41302	MS11541302	FISCHER, Debra (Deb)	NE	6
41503	MS11541503	SASSE, Benjamin Eric	NE	6
40906	MS11540906	SHAHEEN, Jeanne	NH	1
41702	MS11541702	HASSAN, Margaret (Maggie)	NH	1
29373	MS11529373	MENENDEZ, Robert	NJ	1
41308	MS11541308	BOOKER, Cory Anthony	NJ	1
20930	MS11520930	HEINRICH, Martin	NM	1
29924	MS11529924	UDALL, Thomas (Tom)	NM	1
20730	MS11520730	HELLER, Dean	NV	1
41700	MS11541700	CORTEZ MASTO, Catherine Marie	NV	1
14858	MS11514858	SCHUMER, Charles Ellis (Chuck)	NY	1
20735	MS11520735	GILLIBRAND, Kirsten	NY	1
29386	MS11529386	PORTMAN, Robert Jones (Rob)	OH	6
29389	MS11529389	BROWN, Sherrod	OH	1
15424	MS11515424	INHOFE, James Mountain	OK	6
21166	MS11521166	LANKFORD, James	OK	6
14871	MS11514871	WYDEN, Ronald Lee	OR	1
40908	MS11540908	MERKLEY, Jeff	OR	1
29935	MS11529935	TOOMEY, Patrick Joseph	PA	6
40703	MS11540703	CASEY, Robert (Bob), Jr.	PA	1
29142	MS11529142	REED, John F. (Jack)	RI	1
40704	MS11540704	WHITEHOUSE, Sheldon	RI	1
21173	MS11521173	SCOTT, Tim	SC	6
29566	MS11529566	GRAHAM, Lindsey O.	SC	6
29754	MS11529754	THUNE, John	SD	6
41505	MS11541505	ROUNDS, Marion Michael (Mike)	SD	6
40304	MS11540304	ALEXANDER, Lamar	TN	6
40705	MS11540705	CORKER, Robert (Bob)	TN	6
40305	MS11540305	CORNYN, John	TX	6
41304	MS11541304	CRUZ, Rafael Edward (Ted)	TX	6
14503	MS11514503	HATCH, Orrin Grant	UT	6
41110	MS11541110	LEE, Mike	UT	6
40909	MS11540909	WARNER, Mark	VA	1
41305	MS11541305	KAINE, Timothy Michael (Tim)	VA	1
14307	MS11514307	LEAHY, Patrick Joseph	VT	1
29147	MS11529147	SANDERS, Bernard	VT	1
39310	MS11539310	CANTWELL, Maria E.	WA	1
49308	MS11549308	MURRAY, Patty	WA	1
29940	MS11529940	BALDWIN, Tammy	WI	1
41111	MS11541111	JOHNSON, Ron	WI	6
20146	MS11520146	CAPITO, Shelley Moore	WV	6
40915	MS11540915	MANCHIN, Joe, III	WV	1
40707	MS11540707	BARRASSO, John A.	WY	6
49706	MS11549706	ENZI, Michael B.	WY	6

## Sheet: Member Descriptions
id	icpsr	state_abbrev	district_code	cqlabel	name	party_code
MS11514009	14009	MS	0	(MS)	COCHRAN, William Thad	200
MS11520930	20930	NM	0	(NM)	HEINRICH, Martin	100
MS11514871	14871	OR	0	(OR)	WYDEN, Ronald Lee	100
MS11529924	29924	NM	0	(NM)	UDALL, Thomas (Tom)	100
MS11521325	21325	IL	0	(IL)	DUCKWORTH, Tammy	100
MS11549703	49703	ME	0	(ME)	COLLINS, Susan Margaret	200
MS11549700	49700	AL	0	(AL)	SESSIONS, Jefferson Beauregard III (Jeff)	200
MS11549706	49706	WY	0	(WY)	ENZI, Michael B.	200
MS11520330	20330	MD	0	(MD)	VAN HOLLEN, Christopher	100
MS11540704	40704	RI	0	(RI)	WHITEHOUSE, Sheldon	100
MS11540705	40705	TN	0	(TN)	CORKER, Robert (Bob)	200
MS11540707	40707	WY	0	(WY)	BARRASSO, John A.	200
MS11540700	40700	MN	0	(MN)	KLOBUCHAR, Amy	100
MS11540701	40701	MO	0	(MO)	McCASKILL, Claire	100
MS11540702	40702	MT	0	(MT)	TESTER, Jon	100
MS11540703	40703	PA	0	(PA)	CASEY, Robert (Bob), Jr.	100
MS11514307	14307	VT	0	(VT)	LEAHY, Patrick Joseph	100
MS11515015	15015	DE	0	(DE)	CARPER, Thomas Richard	100
MS11529389	29389	OH	0	(OH)	BROWN, Sherrod	100
MS11529386	29386	OH	0	(OH)	PORTMAN, Robert Jones (Rob)	200
MS11514651	14651	FL	0	(FL)	NELSON, Clarence William (Bill)	100
MS11540908	40908	OR	0	(OR)	MERKLEY, Jeff	100
MS11540909	40909	VA	0	(VA)	WARNER, Mark	100
MS11520100	20100	AZ	0	(AZ)	FLAKE, Jeff	200
MS11520101	20101	AR	0	(AR)	BOOZMAN, John	200
MS11540902	40902	ID	0	(ID)	RISCH, James	200
MS11521112	21112	CO	0	(CO)	GARDNER, Cory	200
MS11520730	20730	NV	0	(NV)	HELLER, Dean	200
MS11540906	40906	NH	0	(NH)	SHAHEEN, Jeanne	100
MS11520735	20735	NY	0	(NY)	GILLIBRAND, Kirsten	100
MS11539310	39310	WA	0	(WA)	CANTWELL, Maria E.	100
MS11540300	40300	AK	0	(AK)	MURKOWSKI, Lisa	200
MS11540304	40304	TN	0	(TN)	ALEXANDER, Lamar	200
MS11540305	40305	TX	0	(TX)	CORNYN, John	200
MS11521173	21173	SC	0	(SC)	SCOTT, Tim	200
MS11529534	29534	MS	0	(MS)	WICKER, Roger F.	200
MS11529909	29909	GA	0	(GA)	ISAKSON, Johnny	200
MS11520919	20919	LA	0	(LA)	CASSIDY, Bill	200
MS11541501	41501	GA	0	(GA)	PERDUE, David Alfred, Jr.	200
MS11541500	41500	AK	0	(AK)	SULLIVAN, Daniel Scott	200
MS11541503	41503	NE	0	(NE)	SASSE, Benjamin Eric	200
MS11541502	41502	IA	0	(IA)	ERNST, Joni	200
MS11541505	41505	SD	0	(SD)	ROUNDS, Marion Michael (Mike)	200
MS11541504	41504	NC	0	(NC)	TILLIS, Thomas Roland (Thom)	200
MS11529142	29142	RI	0	(RI)	REED, John F. (Jack)	100
MS11529147	29147	VT	0	(VT)	SANDERS, Bernard	328
MS11529548	29548	NC	0	(NC)	BURR, Richard M.	200
MS11540910	40910	CO	0	(CO)	BENNET, Michael F.	100
MS11540915	40915	WV	0	(WV)	MANCHIN, Joe, III	100
MS11540916	40916	DE	0	(DE)	COONS, Christopher A.	100
MS11515039	15039	AZ	0	(AZ)	McCAIN, John Sidney, III	200
MS11521166	21166	OK	0	(OK)	LANKFORD, James	200
MS11515408	15408	MD	0	(MD)	CARDIN, Benjamin Louis	100
MS11529735	29735	MO	0	(MO)	BLUNT, Roy	200
MS11540904	40904	MN	0	(MN)	FRANKEN, Al	100
MS11529732	29732	MI	0	(MI)	STABENOW, Deborah Ann	100
MS11514226	14226	IA	0	(IA)	GRASSLEY, Charles Ernest	200
MS11514435	14435	MA	0	(MA)	MARKEY, Edward John	100
MS11515021	15021	IL	0	(IL)	DURBIN, Richard Joseph	100
MS11529722	29722	KS	0	(KS)	MORAN, Jerry	200
MS11520707	20707	CT	0	(CT)	MURPHY, Christopher	100
MS11515424	15424	OK	0	(OK)	INHOFE, James Mountain	200
MS11520146	20146	WV	0	(WV)	CAPITO, Shelley Moore	200
MS11514921	14921	KY	0	(KY)	McCONNELL, Addison Mitchell (Mitch)	200
MS11529754	29754	SD	0	(SD)	THUNE, John	200
MS11529345	29345	ID	0	(ID)	CRAPO, Michael Dean	200
MS11520713	20713	HI	0	(HI)	HIRONO, Mazie	100
MS11521133	21133	IN	0	(IN)	YOUNG, Todd	200
MS11520717	20717	IN	0	(IN)	DONNELLY, Joe	100
MS11541305	41305	VA	0	(VA)	KAINE, Timothy Michael (Tim)	100
MS11541304	41304	TX	0	(TX)	CRUZ, Rafael Edward (Ted)	200
MS11541303	41303	ND	0	(ND)	HEITKAMP, Mary Kathryn (Heidi)	100
MS11541302	41302	NE	0	(NE)	FISCHER, Debra (Deb)	200
MS11541301	41301	MA	0	(MA)	WARREN, Elizabeth	100
MS11541300	41300	ME	0	(ME)	KING, Angus Stanley, Jr.	328
MS11541308	41308	NJ	0	(NJ)	BOOKER, Cory Anthony	100
MS11529940	29940	WI	0	(WI)	BALDWIN, Tammy	100
MS11541112	41112	HI	0	(HI)	SCHATZ, Brian Emanuel	100
MS11541110	41110	UT	0	(UT)	LEE, Mike	200
MS11541111	41111	WI	0	(WI)	JOHNSON, Ron	200
MS11521301	21301	AR	0	(AR)	COTTON, Tom	200
MS11514858	14858	NY	0	(NY)	SCHUMER, Charles Ellis (Chuck)	100
MS11541703	41703	LA	0	(LA)	KENNEDY, John Neely	200
MS11541702	41702	NH	0	(NH)	HASSAN, Margaret (Maggie)	100
MS11541701	41701	CA	0	(CA)	HARRIS, Kamala Devi	100
MS11541700	41700	NV	0	(NV)	CORTEZ MASTO, Catherine Marie	100
MS11594659	94659	AL	0	(AL)	SHELBY, Richard C.	200
MS11514503	14503	UT	0	(UT)	HATCH, Orrin Grant	200
MS11529373	29373	NJ	0	(NJ)	MENENDEZ, Robert	100
MS11529566	29566	SC	0	(SC)	GRAHAM, Lindsey O.	200
MS11520923	20923	MI	0	(MI)	PETERS, Gary C.	100
MS11541104	41104	KY	0	(KY)	PAUL, Rand	200
MS11541107	41107	ND	0	(ND)	HOEVEN, John	200
MS11529935	29935	PA	0	(PA)	TOOMEY, Patrick Joseph	200
MS11541101	41101	CT	0	(CT)	BLUMENTHAL, Richard	100
MS11541102	41102	FL	0	(FL)	RUBIO, Marco	200
MS11521338	21338	MT	0	(MT)	DAINES, Steve	200
MS11514852	14852	KS	0	(KS)	ROBERTS, Charles Patrick (Pat)	200
MS11549308	49308	WA	0	(WA)	MURRAY, Patty	100
MS11549300	49300	CA	0	(CA)	FEINSTEIN, Dianne	100

## Sheet: Roll Call Descriptions
vote	id	chamber	congress	date	rollnumber	description
V0	RS1150025	Senate	115	2017-01-12	25	To create a point of order against legislation that would undermine the historic coverage gains the United States has made in children's health, which have resulted in the lowest uninsured rate for children in the Nation's history.
